# Supplementary material
Source: Research Square preprint supplement (doi:10.21203/rs.3.rs-10285101/v1)
Supplement: Supplementary file 1 [file 8feeaef30f03df4cd5ebb904.docx]

**Supplementary Materials**

**Assessment of Heavy Metal Contamination in Soils from Street Garages in Dar es Salaam Using EDXRF**

All concentrations are reported in mg/kg as final laboratory-reported, CRM-adjusted values, not raw PE-EDXRF outputs. Each garage-soil sample represents a composite of five surface subsamples collected at one garage/activity area. The laboratory established CRM-derived element-specific calibration correction factors from NIST SRM 2711a and applied them to raw element results and their associated analytical standard deviations before issuing the reported data sheets. Reference controls were collected away from garage operations.

Table S1a. Individual garage-soil composite concentrations for Ilala.

| **Sample ID** | **Activity type** | **Cr** | **Fe** | **Ni** | **Cu** | **Zn** | **As** | **Hg** | **Pb** |
| --- | --- | --- | --- | --- | --- | --- | --- | --- | --- |
| ILPA_1 | Paint-related | 98.837 | 27391.334 | 38.001 | 416.102 | 806.310 | 6.806 | 1.731 | 222.359 |
| ILPA_2 | Paint-related | 109.256 | 43530.920 | 86.527 | 3868.365 | 2547.399 | 0.000 | 7.836 | 1707.908 |
| ILPA_3 | Paint-related | 162.660 | 25257.494 | 27.062 | 143.821 | 1028.009 | 7.260 | 1.346 | 199.097 |
| ILPB_1 | Paint-related | 144.730 | 20073.670 | 13.840 | 93.700 | 536.690 | 3.740 | 0.480 | 58.550 |
| ILPB_2 | Paint-related | 102.832 | 28112.371 | 22.137 | 113.920 | 598.693 | 2.269 | 1.250 | 95.500 |
| ILAOA_1 | Oil-change | 463.948 | 21869.427 | 12.494 | 78.438 | 366.851 | 0.000 | 2.163 | 71.502 |
| ILAOA_2 | Oil-change | 251.257 | 24438.037 | 19.234 | 187.853 | 909.352 | 0.000 | 1.442 | 223.144 |
| ILOB-1 | Oil-change | 61.334 | 13078.338 | 10.265 | 124.211 | 417.237 | 3.233 | 1.346 | 77.637 |
| ILOB-2 | Oil-change | 34.993 | 18423.449 | 30.432 | 191.898 | 864.371 | 3.176 | 1.058 | 116.651 |
| ILOB-3 | Oil-change | 229.735 | 18915.970 | 28.566 | 271.770 | 1171.826 | 6.466 | 0.000 | 168.524 |

Table S1b. Individual garage-soil composite concentrations for Temeke.

| **Sample ID** | **Activity type** | **Cr** | **Fe** | **Ni** | **Cu** | **Zn** | **As** | **Hg** | **Pb** |
| --- | --- | --- | --- | --- | --- | --- | --- | --- | --- |
| TPA | Paint-related | 36.359 | 19395.535 | 20.012 | 18.586 | 82.286 | 0.000 | 2.932 | 35.874 |
| TPA_1 | Paint-related | 65.208 | 18695.791 | 21.411 | 67.379 | 554.113 | 0.000 | 1.827 | 78.569 |
| TPA_2 | Paint-related | 427.690 | 25561.164 | 18.664 | 62.157 | 525.216 | 0.000 | 1.250 | 94.813 |
| TPA_3 | Paint-related | 43.686 | 24159.670 | 11.302 | 59.085 | 473.896 | 0.000 | 1.731 | 53.295 |
| TPB | Paint-related | 40.695 | 21214.293 | 27.788 | 30.618 | 302.450 | 0.000 | 1.635 | 61.442 |
| TPB_1 | Paint-related | 54.367 | 19418.628 | 9.228 | 42.547 | 339.489 | 0.000 | 2.019 | 103.499 |
| TPB_2 | Paint-related | 54.086 | 22111.743 | 17.471 | 75.981 | 561.454 | 0.000 | 1.346 | 90.151 |
| TPB_3 | Paint-related | 174.364 | 27495.678 | 11.717 | 51.661 | 510.601 | 0.000 | 0.913 | 48.879 |
| TOA_1 | Oil-change | 51.014 | 22494.486 | 19.597 | 149.248 | 684.049 | 0.000 | 2.452 | 262.404 |
| TOA_2 | Oil-change | 45.413 | 20572.213 | 13.065 | 127.181 | 558.785 | 0.000 | 2.356 | 122.295 |
| TOA_3 | Oil-change | 31.420 | 152820.867 | 13.583 | 1276.774 | 9732.117 | 5.445 | 0.385 | 0.000 |
| TOB_1 | Oil-change | 50.693 | 22477.656 | 13.842 | 260.198 | 1198.654 | 0.000 | 2.548 | 441.233 |
| TOB_2 | Oil-change | 43.847 | 170661.571 | 16.590 | 1607.629 | 10521.810 | 9.075 | 5.192 | 23.605 |
| TOB_3 | Oil-change | 47.501 | 10035.566 | 5.703 | 44.339 | 256.869 | 0.000 | 1.394 | 95.255 |

Table S1c. Individual garage-soil composite concentrations for Kinondoni.

| **Sample ID** | **Activity type** | **Cr** | **Fe** | **Ni** | **Cu** | **Zn** | **As** | **Hg** | **Pb** |
| --- | --- | --- | --- | --- | --- | --- | --- | --- | --- |
| KPA_1 | Paint-related | 106.887 | 47080.792 | 99.384 | 333.414 | 1445.513 | 0.000 | 2.981 | 339.010 |
| KPA-2 | Paint-related | 122.667 | 42621.321 | 107.472 | 344.166 | 1472.274 | 0.000 | 2.356 | 569.319 |
| KPA_3 | Paint-related | 106.968 | 55150.431 | 76.832 | 235.776 | 778.415 | 0.000 | 1.923 | 276.390 |
| KPB_1 | Paint-related | 108.995 | 40641.815 | 80.098 | 290.816 | 1234.892 | 0.000 | 2.548 | 282.378 |
| KPB-2 | Paint-related | 122.828 | 43133.876 | 110.323 | 350.003 | 1358.355 | 0.000 | 2.740 | 574.472 |
| KPB-3 | Paint-related | 109.658 | 39401.641 | 126.550 | 379.187 | 1153.807 | 0.000 | 2.932 | 384.257 |
| KOA | Oil-change | 31.319 | 11832.952 | 4.459 | 41.933 | 397.149 | 0.000 | 1.586 | 55.209 |
| KOA_1 | Oil-change | 230.338 | 14721.097 | 13.739 | 128.051 | 525.817 | 0.000 | 0.481 | 120.528 |
| KOA_2 | Oil-change | 59.346 | 10203.725 | 8.088 | 59.853 | 298.312 | 0.000 | 0.817 | 79.600 |
| KOA_3 | Oil-change | 85.144 | 15615.630 | 10.576 | 81.715 | 341.891 | 0.000 | 0.913 | 90.887 |
| KOB | Oil-change | 59.587 | 14783.062 | 13.220 | 79.718 | 1063.246 | 0.284 | 1.683 | 106.395 |
| KOB_1 | Oil-change | 433.933 | 16117.571 | 13.946 | 124.672 | 509.800 | 0.000 | 2.115 | 133.926 |
| KOB-2 | Oil-change | 28.428 | 8957.861 | 6.221 | 58.675 | 275.021 | 0.000 | 1.106 | 73.318 |
| KOB-3 | Oil-change | 50.472 | 16880.953 | 11.820 | 67.840 | 298.980 | 0.000 | 2.115 | 84.409 |

Table S1d. District-specific reference-control soil concentrations.

| **Control ID** | **District** | **Selection context** | **Cr** | **Fe** | **Ni** | **Cu** | **Zn** | **As** | **Hg** | **Pb** |
| --- | --- | --- | --- | --- | --- | --- | --- | --- | --- | --- |
| ILCA | Ilala | Collected away from garage operations | 28.228 | 11227.401 | 10.058 | 38.605 | 868.709 | 0.000 | 1.394 | 53.050 |
| TCB | Temeke | Collected away from garage operations | 43.827 | 14030.677 | 8.347 | 81.869 | 510.734 | 42.653 | 1.779 | 58.546 |
| KIN-C | Kinondoni | Collected away from garage operations | 22.650 | 7850.000 | 3.620 | 31.250 | 210.450 | 0.000 | 0.272 | 42.600 |

Table S2. District-level final reported values used for contamination-factor and pollution-load-index calculations.

| **District** | **n** | **Mean Cu** | **Mean Zn** | **Mean Pb** | **Control ID** | **Control Cu** | **Control Zn** | **Control Pb** | **CF Cu** | **CF Zn** | **CF Pb** | **PLI** |
| --- | --- | --- | --- | --- | --- | --- | --- | --- | --- | --- | --- | --- |
| Ilala | 10 | 549.01 | 924.67 | 294.09 | ILCA | 38.60 | 868.71 | 53.05 | 14.22 | 1.06 | 5.54 | 4.38 |
| Temeke | 14 | 276.67 | 1878.70 | 107.95 | TCB | 81.87 | 510.73 | 58.55 | 3.38 | 3.68 | 1.84 | 2.84 |
| Kinondoni | 14 | 183.99 | 796.68 | 226.44 | KIN-C | 31.25 | 210.45 | 42.60 | 5.89 | 3.79 | 5.32 | 4.91 |

Note: CF = district garage-soil mean divided by the concentration in the available local reference-control soil.

All values are calculated from final laboratory-reported CRM-adjusted concentrations. Because one local control was available per district, these indices are screening-level indicators.
