# Supplementary material
Source: Research Square preprint supplement (doi:10.21203/rs.3.rs-10285101/v1)
Supplement: Supplementary file 2 [file f5ad594fb4b8f92cf41f4f34.xlsx]

## Sheet: Raw Data
Sample ID	District	Sample type	Activity type	Cr	Fe	Ni	Cu	Zn	As	Hg	Pb
ILPA_1	Ilala	Garage composite	Paint-related	98.837	27391.3	38.001	416.102	806.31	6.806	1.731	222.359
ILPA_2	Ilala	Garage composite	Paint-related	109.256	43530.9	86.527	3868.36	2547.4	0	7.836	1707.91
ILPA_3	Ilala	Garage composite	Paint-related	162.66	25257.5	27.062	143.821	1028.01	7.26	1.346	199.097
ILPB_1	Ilala	Garage composite	Paint-related	144.73	20073.7	13.84	93.7	536.69	3.74	0.48	58.55
ILPB_2	Ilala	Garage composite	Paint-related	102.832	28112.4	22.137	113.92	598.693	2.269	1.25	95.5
ILAOA_1	Ilala	Garage composite	Oil-change	463.948	21869.4	12.494	78.438	366.851	0	2.163	71.502
ILAOA_2	Ilala	Garage composite	Oil-change	251.257	24438	19.234	187.853	909.352	0	1.442	223.144
ILOB-1	Ilala	Garage composite	Oil-change	61.334	13078.3	10.265	124.211	417.237	3.233	1.346	77.637
ILOB-2	Ilala	Garage composite	Oil-change	34.993	18423.4	30.432	191.898	864.371	3.176	1.058	116.651
ILOB-3	Ilala	Garage composite	Oil-change	229.735	18916	28.566	271.77	1171.83	6.466	0	168.524
TPA	Temeke	Garage composite	Paint-related	36.359	19395.5	20.012	18.586	82.286	0	2.932	35.874
TPA_1	Temeke	Garage composite	Paint-related	65.208	18695.8	21.411	67.379	554.113	0	1.827	78.569
TPA_2	Temeke	Garage composite	Paint-related	427.69	25561.2	18.664	62.157	525.216	0	1.25	94.813
TPA_3	Temeke	Garage composite	Paint-related	43.686	24159.7	11.302	59.085	473.896	0	1.731	53.295
TPB	Temeke	Garage composite	Paint-related	40.695	21214.3	27.788	30.618	302.45	0	1.635	61.442
TPB_1	Temeke	Garage composite	Paint-related	54.367	19418.6	9.228	42.547	339.489	0	2.019	103.499
TPB_2	Temeke	Garage composite	Paint-related	54.086	22111.7	17.471	75.981	561.454	0	1.346	90.151
TPB_3	Temeke	Garage composite	Paint-related	174.364	27495.7	11.717	51.661	510.601	0	0.913	48.879
TOA_1	Temeke	Garage composite	Oil-change	51.014	22494.5	19.597	149.248	684.049	0	2.452	262.404
TOA_2	Temeke	Garage composite	Oil-change	45.413	20572.2	13.065	127.181	558.785	0	2.356	122.295
TOA_3	Temeke	Garage composite	Oil-change	31.42	152821	13.583	1276.77	9732.12	5.445	0.385	0
TOB_1	Temeke	Garage composite	Oil-change	50.693	22477.7	13.842	260.198	1198.65	0	2.548	441.233
TOB_2	Temeke	Garage composite	Oil-change	43.847	170662	16.59	1607.63	10521.8	9.075	5.192	23.605
TOB_3	Temeke	Garage composite	Oil-change	47.501	10035.6	5.703	44.339	256.869	0	1.394	95.255
KPA_1	Kinondoni	Garage composite	Paint-related	106.887	47080.8	99.384	333.414	1445.51	0	2.981	339.01
KPA-2	Kinondoni	Garage composite	Paint-related	122.667	42621.3	107.472	344.166	1472.27	0	2.356	569.319
KPA_3	Kinondoni	Garage composite	Paint-related	106.968	55150.4	76.832	235.776	778.415	0	1.923	276.39
KPB_1	Kinondoni	Garage composite	Paint-related	108.995	40641.8	80.098	290.816	1234.89	0	2.548	282.378
KPB-2	Kinondoni	Garage composite	Paint-related	122.828	43133.9	110.323	350.003	1358.36	0	2.74	574.472
KPB-3	Kinondoni	Garage composite	Paint-related	109.658	39401.6	126.55	379.187	1153.81	0	2.932	384.257
KOA	Kinondoni	Garage composite	Oil-change	31.319	11833	4.459	41.933	397.149	0	1.586	55.209
KOA_1	Kinondoni	Garage composite	Oil-change	230.338	14721.1	13.739	128.051	525.817	0	0.481	120.528
KOA_2	Kinondoni	Garage composite	Oil-change	59.346	10203.7	8.088	59.853	298.312	0	0.817	79.6
KOA_3	Kinondoni	Garage composite	Oil-change	85.144	15615.6	10.576	81.715	341.891	0	0.913	90.887
KOB	Kinondoni	Garage composite	Oil-change	59.587	14783.1	13.22	79.718	1063.25	0.284	1.683	106.395
KOB_1	Kinondoni	Garage composite	Oil-change	433.933	16117.6	13.946	124.672	509.8	0	2.115	133.926
KOB-2	Kinondoni	Garage composite	Oil-change	28.428	8957.86	6.221	58.675	275.021	0	1.106	73.318
KOB-3	Kinondoni	Garage composite	Oil-change	50.472	16881	11.82	67.84	298.98	0	2.115	84.409
ILCA	Ilala	Reference control	Reference control	28.228	11227.4	10.058	38.605	868.709	0	1.394	53.05
TCB	Temeke	Reference control	Reference control	43.827	14030.7	8.347	81.869	510.734	42.653	1.779	58.546
KIN-C	Kinondoni	Reference control	Reference control	22.65	7850	3.62	31.25	210.45	0	0.272	42.6

## Sheet: CF_PLI Calculation
District	n	Mean Cu	Mean Zn	Mean Pb	Control ID	Control Cu	Control Zn	Control Pb	CF Cu	CF Zn	CF Pb	PLI
Ilala	10	549.008	924.674	294.087	ILCA	38.605	868.709	53.05	14.2212	1.06442	5.54359	4.37804
Temeke	14	276.67	1878.7	107.951	TCB	81.869	510.734	58.546	3.37943	3.67843	1.84387	2.84061
Kinondoni	14	183.987	796.677	226.436	KIN-C	31.25	210.45	42.6	5.88759	3.78559	5.31539	4.91136

## Sheet: Notes
Supplementary dataset notes
Dataset	Final laboratory-reported CRM-adjusted concentrations and CF/PLI calculation inputs for the Dar es Salaam street-garage soil study.
Units	All elemental concentrations are mg/kg.
Sampling unit	Each garage-soil result is a composite of five 0-10 cm surface subsamples from one garage/activity area.
Reference controls	One reference-control soil per district, collected away from garage operations.
CF	District garage-soil mean / district reference-control concentration.
PLI	[CF(Cu) × CF(Zn) × CF(Pb)]^(1/3).
Analytical note	Individual values are final laboratory-reported CRM-adjusted concentrations. Analytical ± terms supplied in the original laboratory result sheets represent reported analytical SDs and are not spatial replicates.
Reporting status	All values in this workbook are final reported values, not raw PE-EDXRF outputs.
Calibration-correction status	The laboratory established CRM-derived element-specific calibration correction factors and applied them before reporting the data.
